# Supplementary material for: Nucleus Pulposus Cells Induce M2 Polarization of RAW264.7 via CX3CL1/CX3CR1 Pathway and M2 Macrophages Promote Proliferation and Anabolism of Nucleus Pulposus Cells
Source: Hindawi journal article supplement (doi:10.1155/2023/6400162), 2023-02-20

Bases content along reads ( M1 )

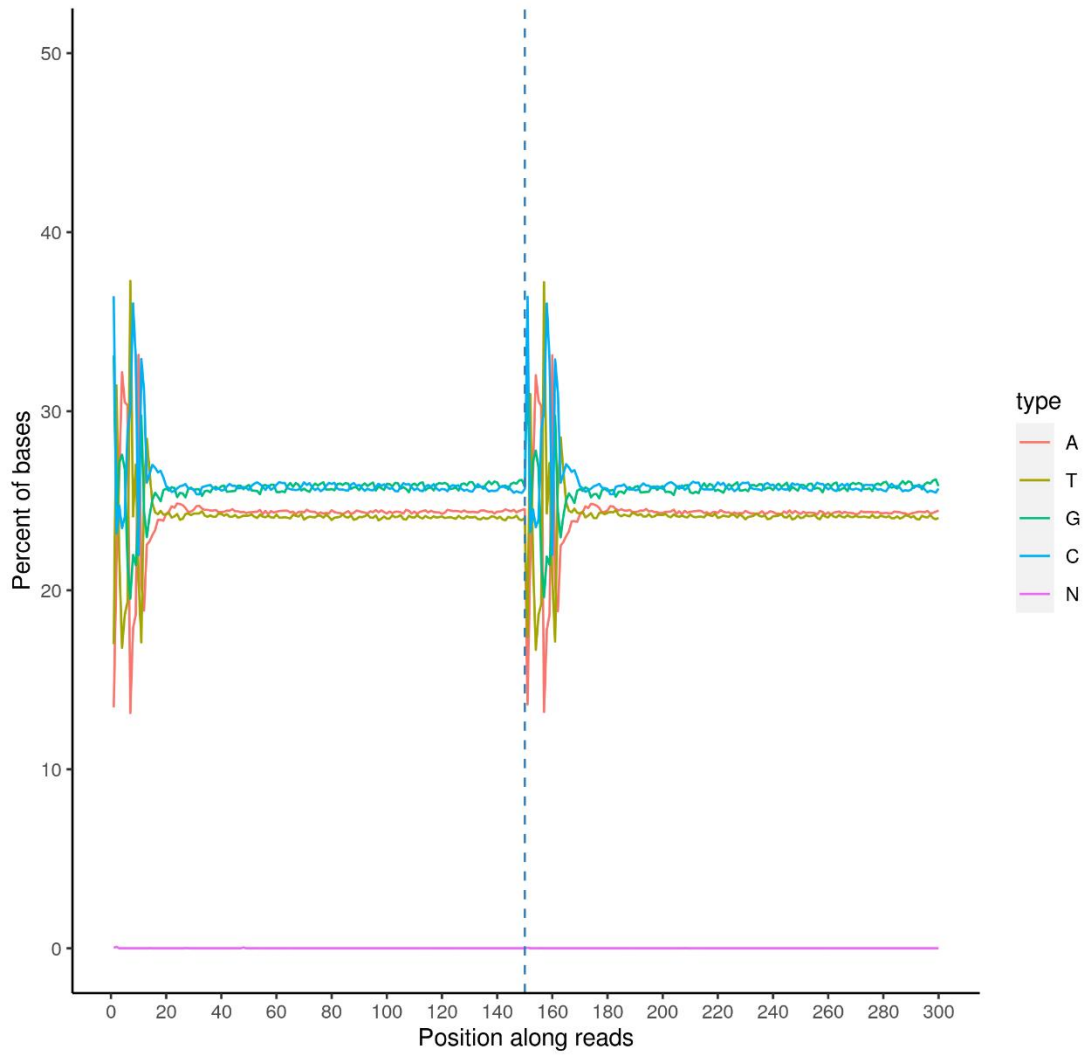

Bases content along reads ( M2 )

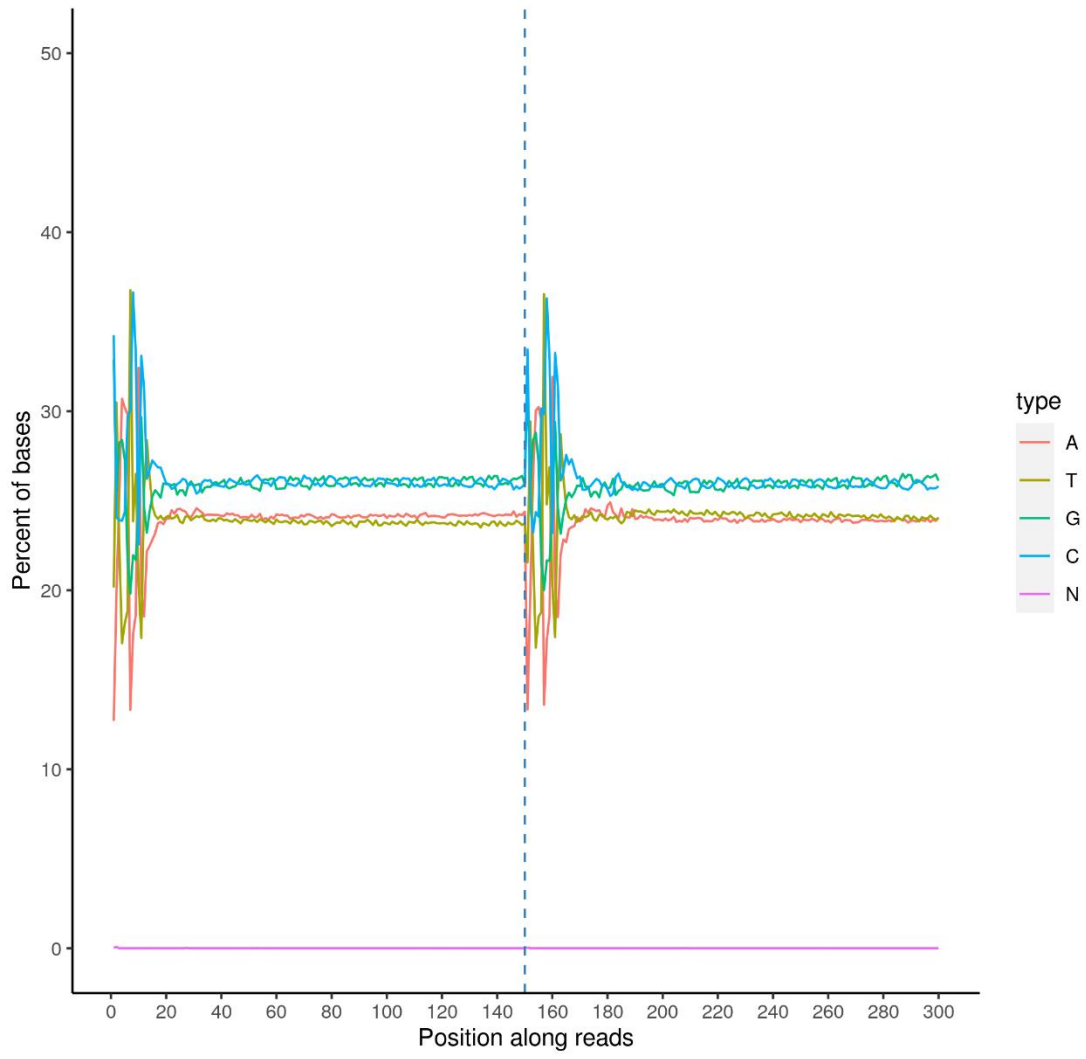

Bases content along reads ( M3 )

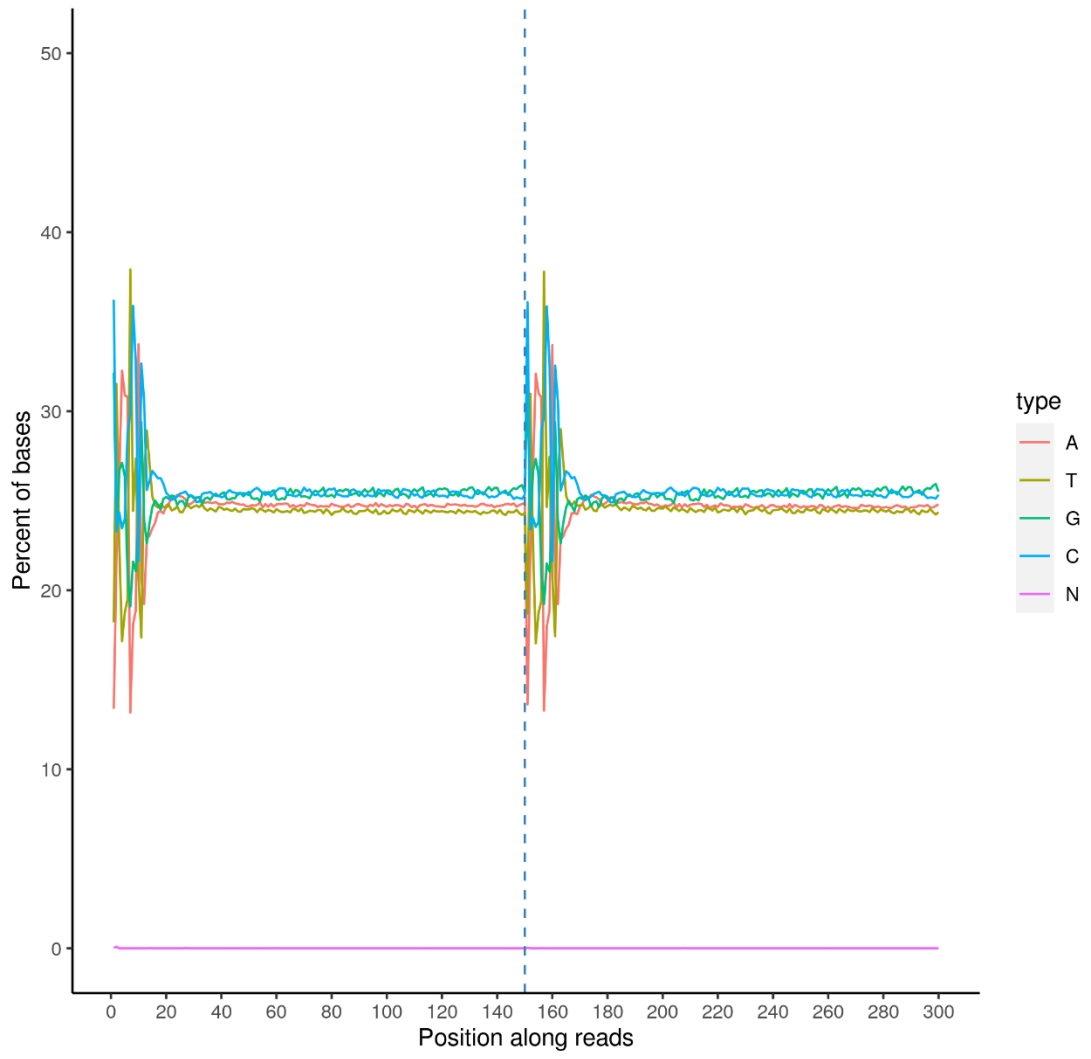

Bases content along reads ( N1 )

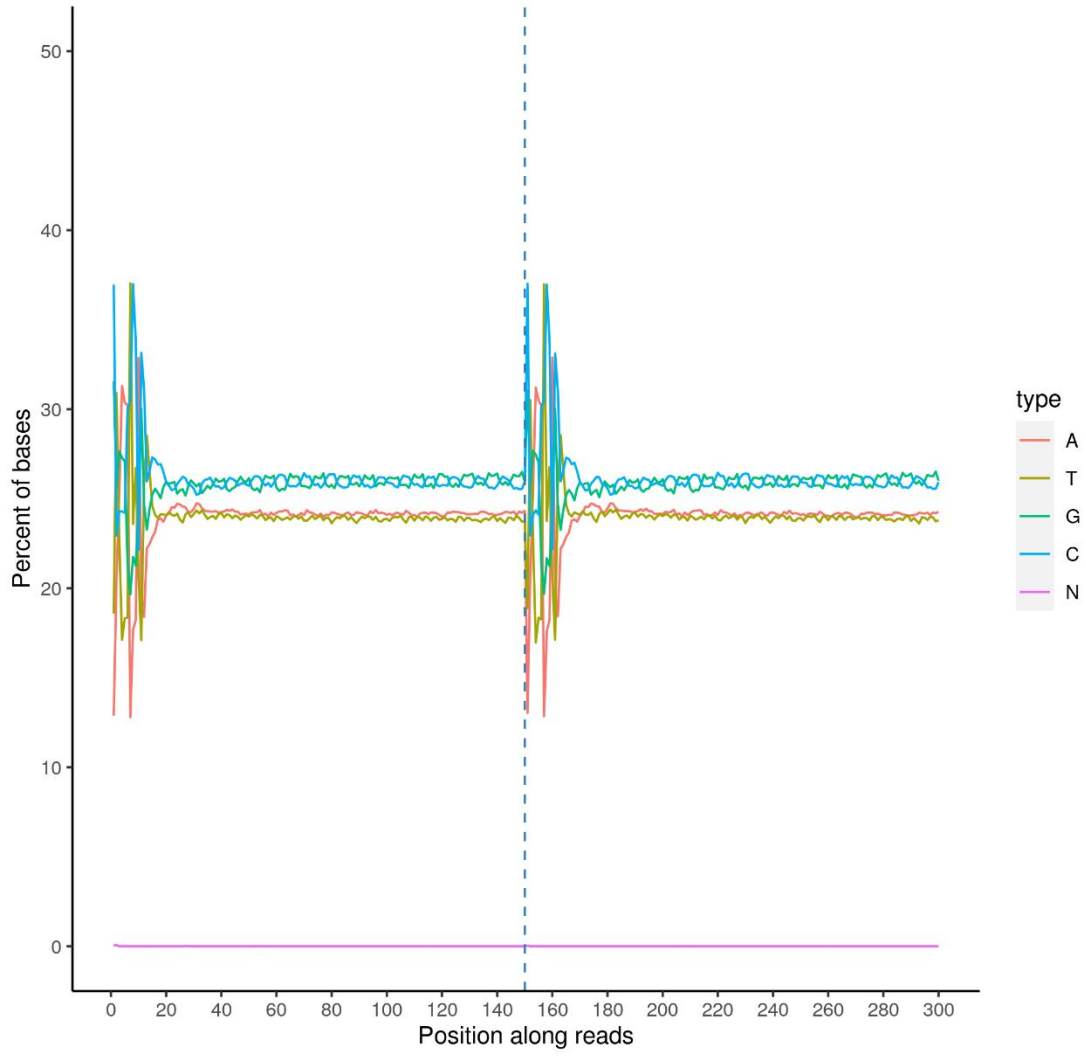

Bases content along reads ( N2 )

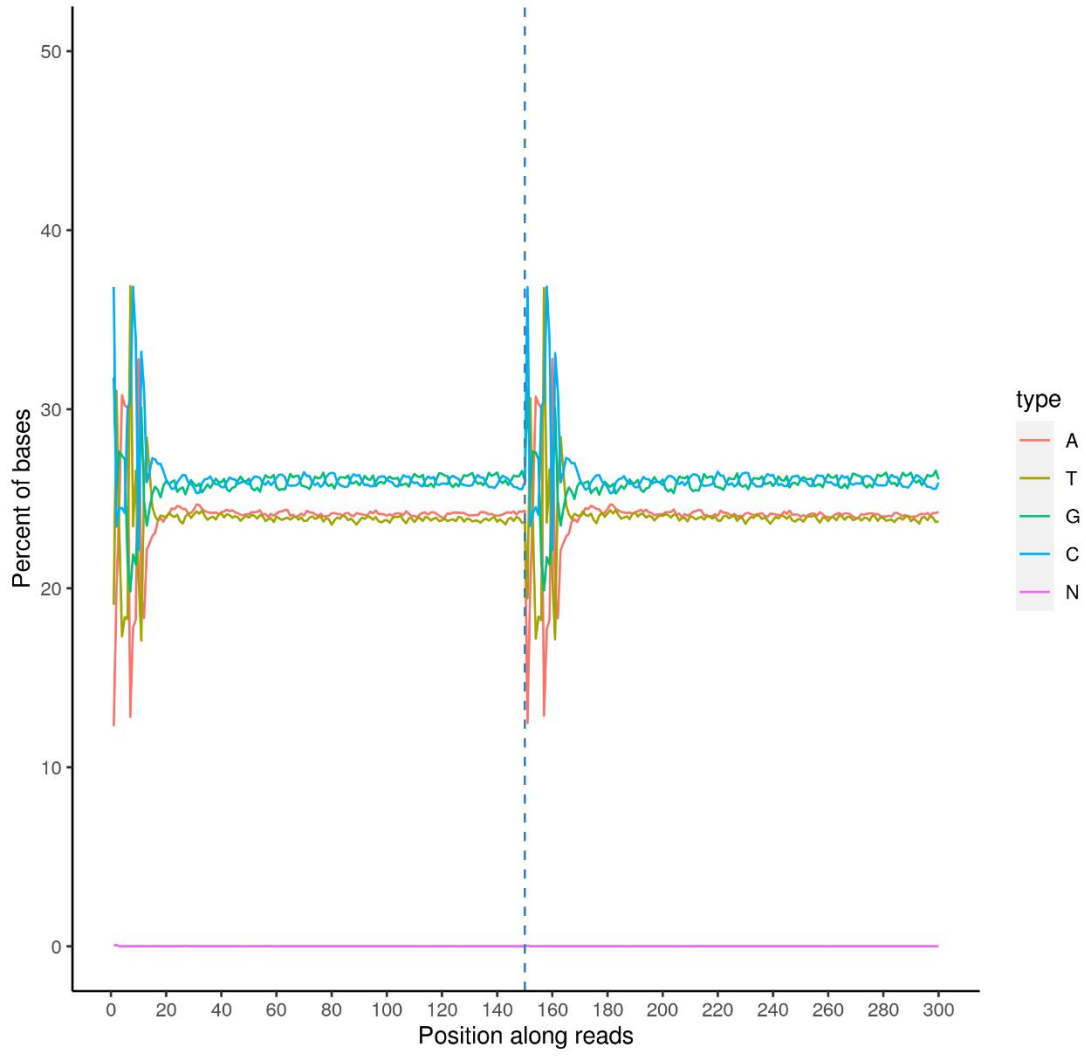

Bases content along reads ( N3 )

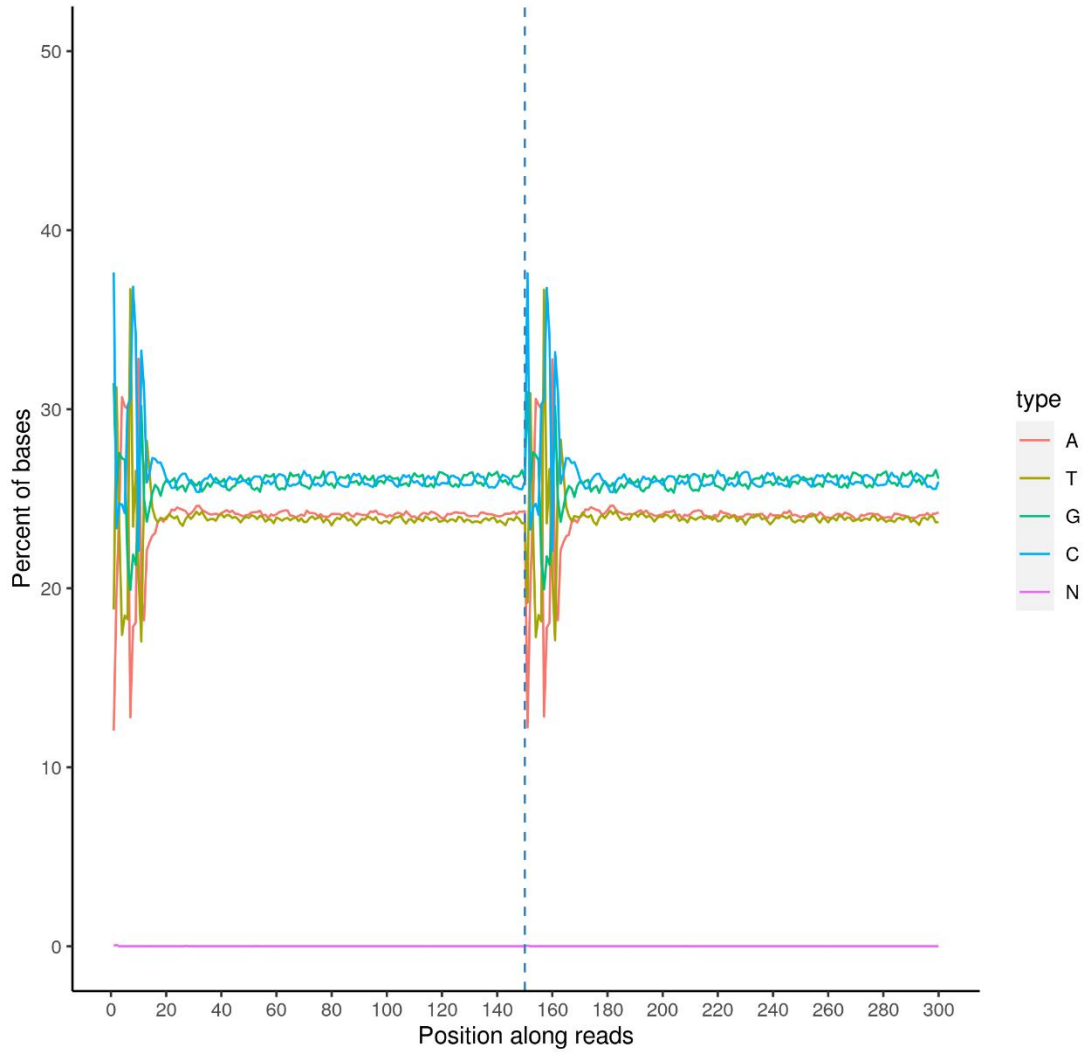

Supplement: f4 [file 6400162.f4.pdf]
