# Supplementary material for: Nucleus Pulposus Cells Induce M2 Polarization of RAW264.7 via CX3CL1/CX3CR1 Pathway and M2 Macrophages Promote Proliferation and Anabolism of Nucleus Pulposus Cells
Source: Hindawi journal article supplement (doi:10.1155/2023/6400162), 2023-02-20

### Percent of genome regions (M1)

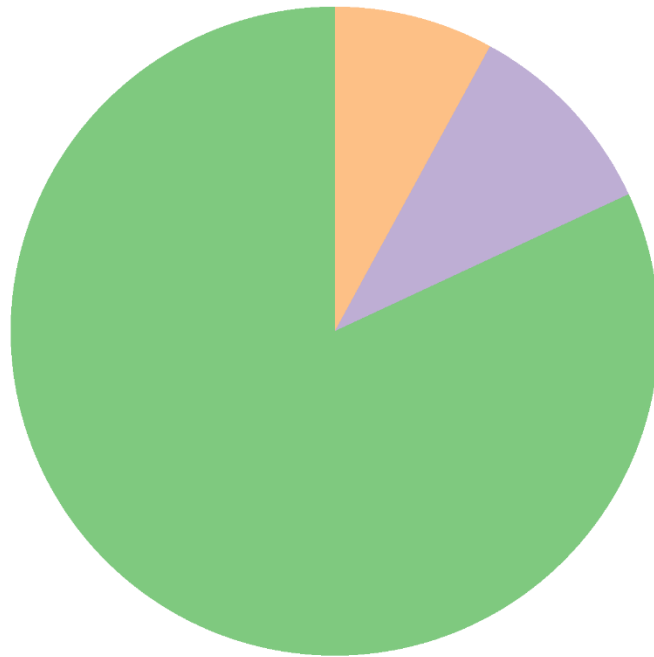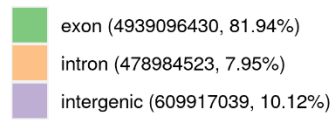

## Percent of genome regions (M2)

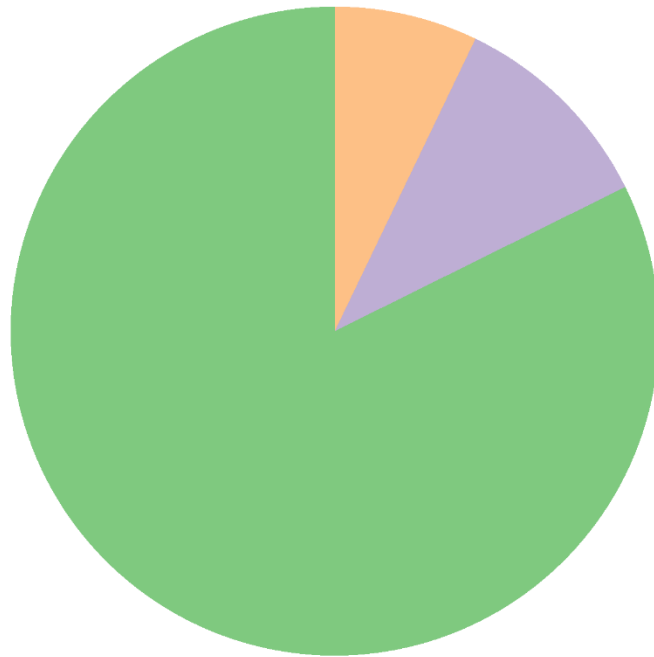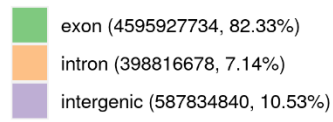

### Percent of genome regions (M3)

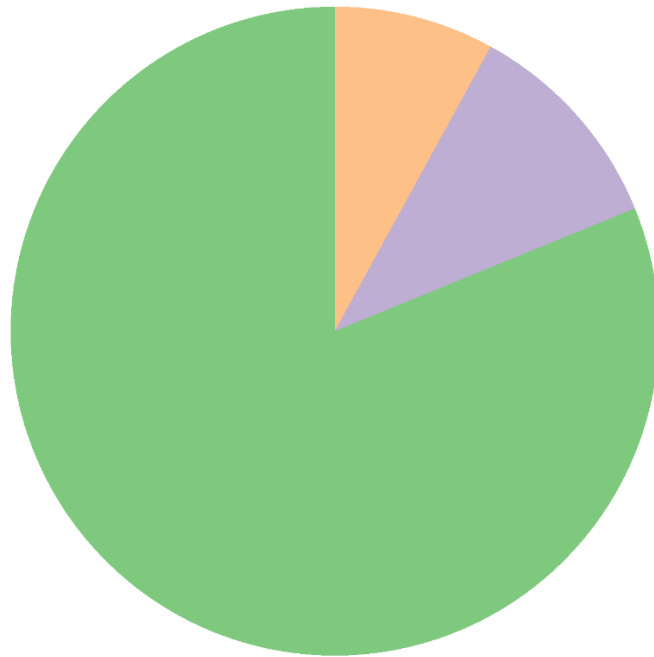

- exon (5094775364, 81.17%)
- intron (501171659, 7.98%)
- intergenic (680547853, 10.84%)

### Percent of genome regions (N1)

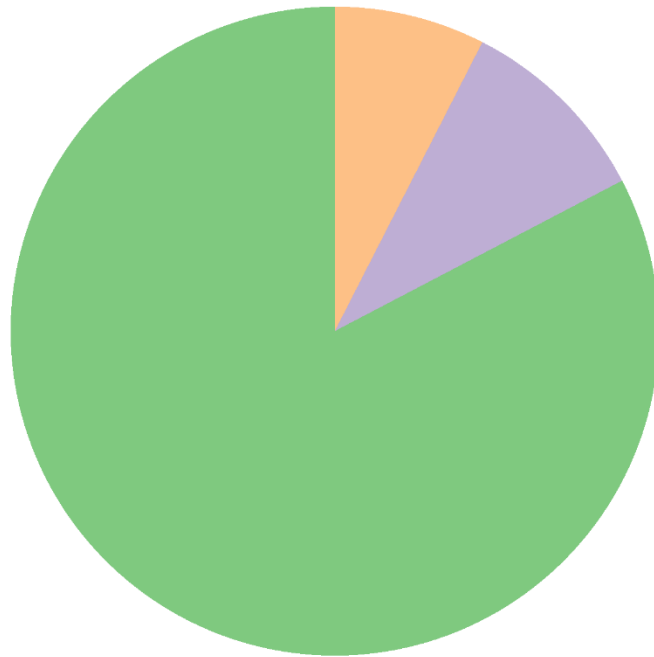

- exon (5027731318, 82.67%)
- intron (457433097, 7.52%)
- intergenic (596388960, 9.81%)

### Percent of genome regions (N2)

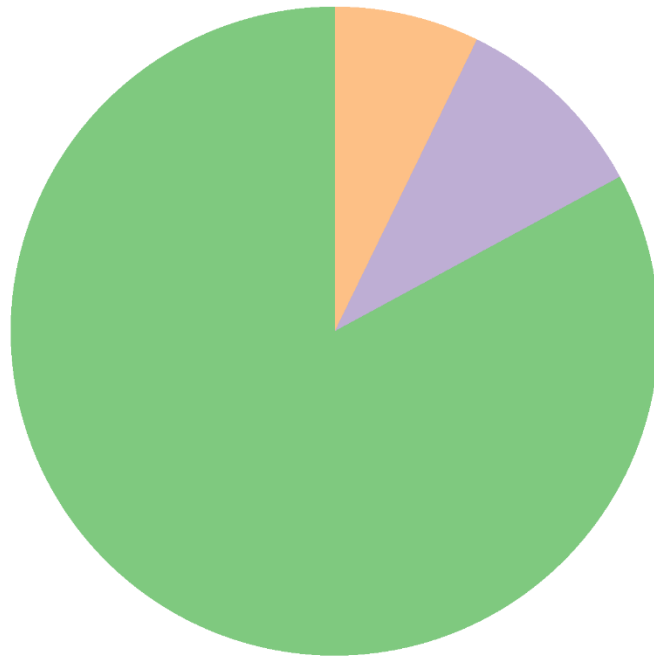

|   |                               |
|---|-------------------------------|
| ■ | exon (4879161053, 82.90%)     |
| ■ | intron (425038501, 7.22%)     |
| ■ | intergenic (581653553, 9.88%) |

### Percent of genome regions (N3)

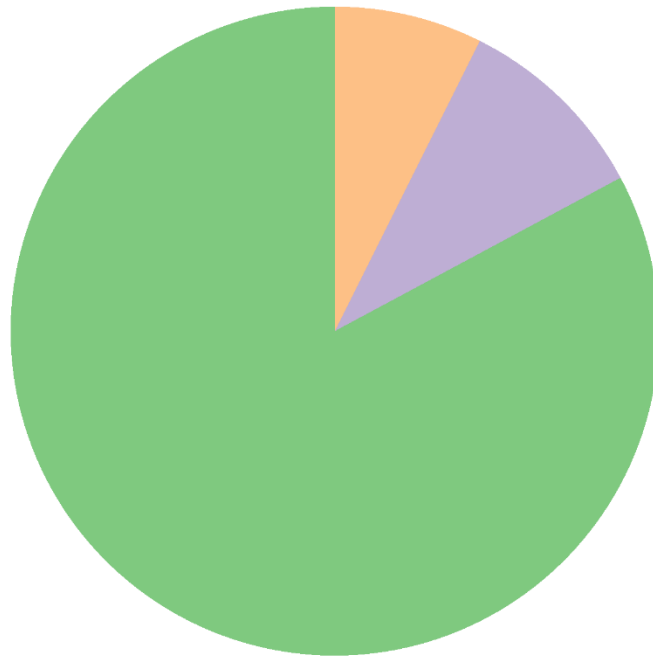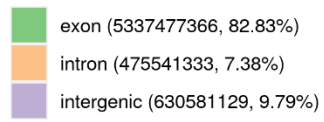

Supplement: f7 [file 6400162.f7.pdf]
