# Supplementary figures and images for: Nucleus Pulposus Cells Induce M2 Polarization of RAW264.7 via CX3CL1/CX3CR1 Pathway and M2 Macrophages Promote Proliferation and Anabolism of Nucleus Pulposus Cells
Source: Hindawi journal article supplement (doi:10.1155/2023/6400162), 2023-02-20

gene expression distribution

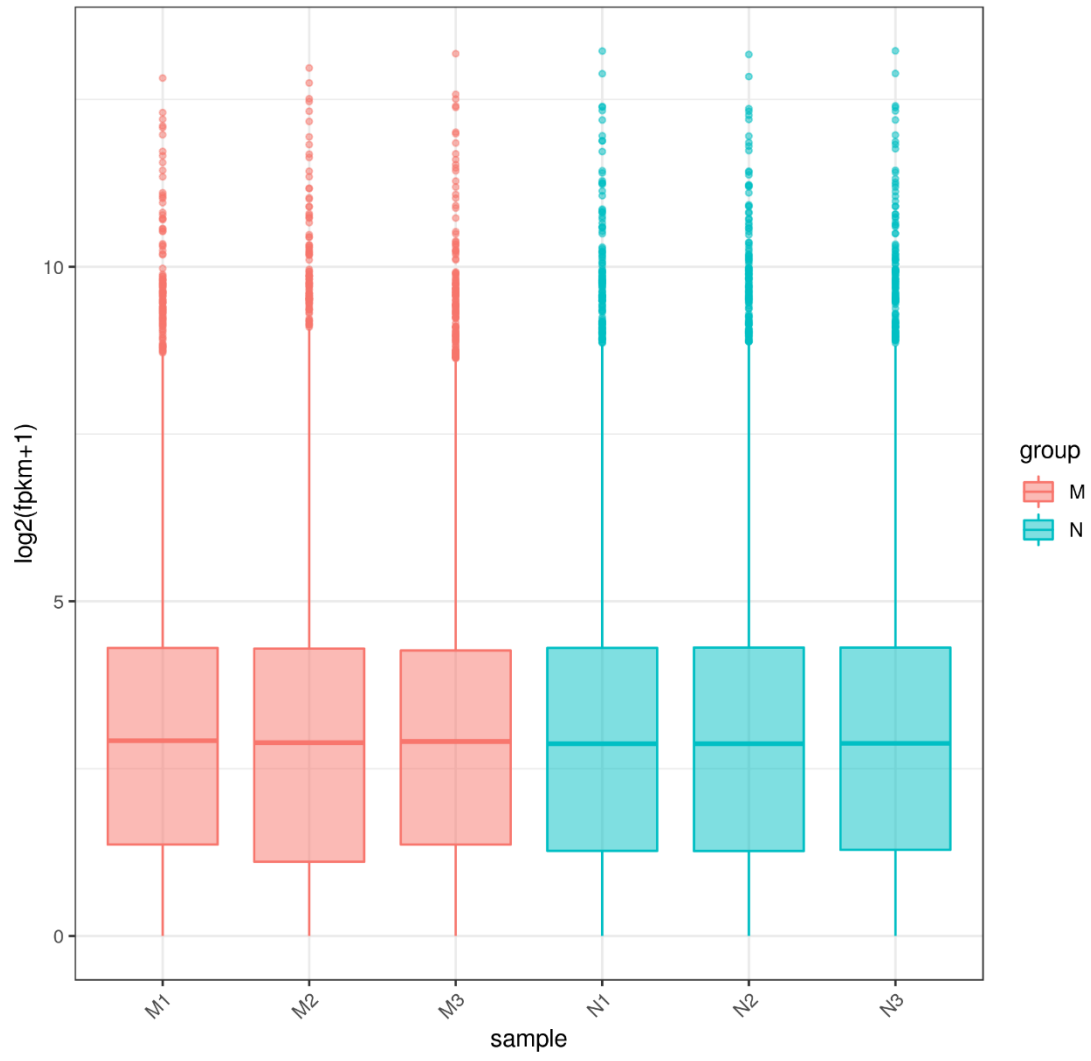

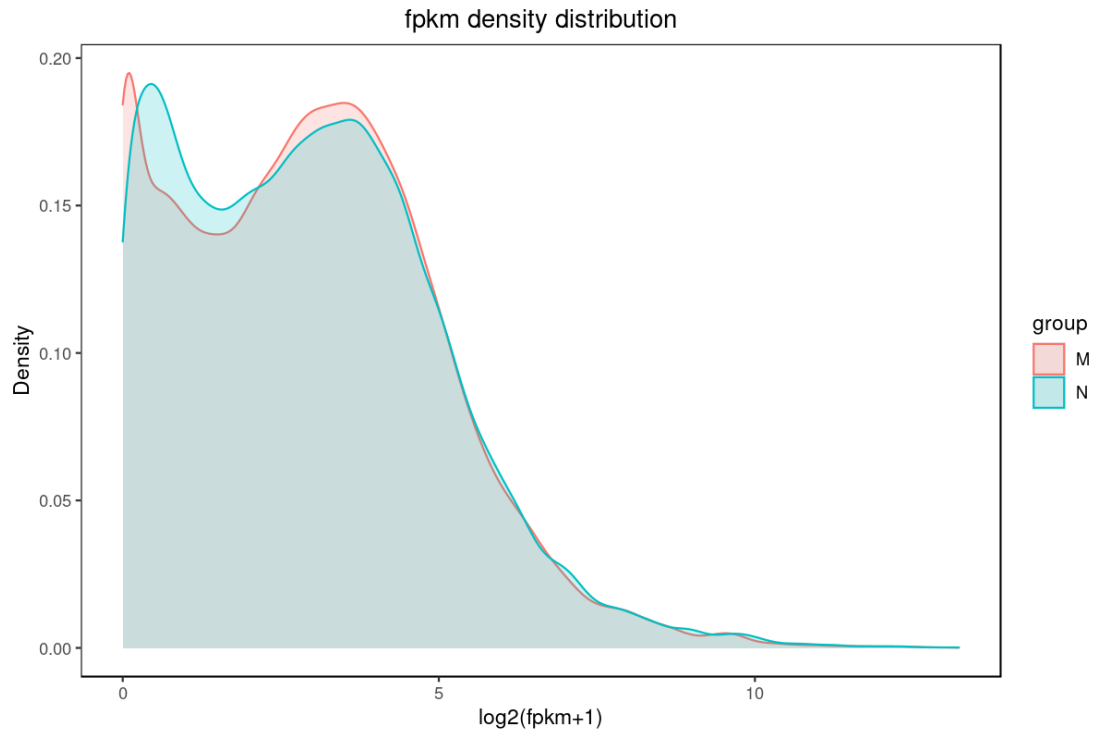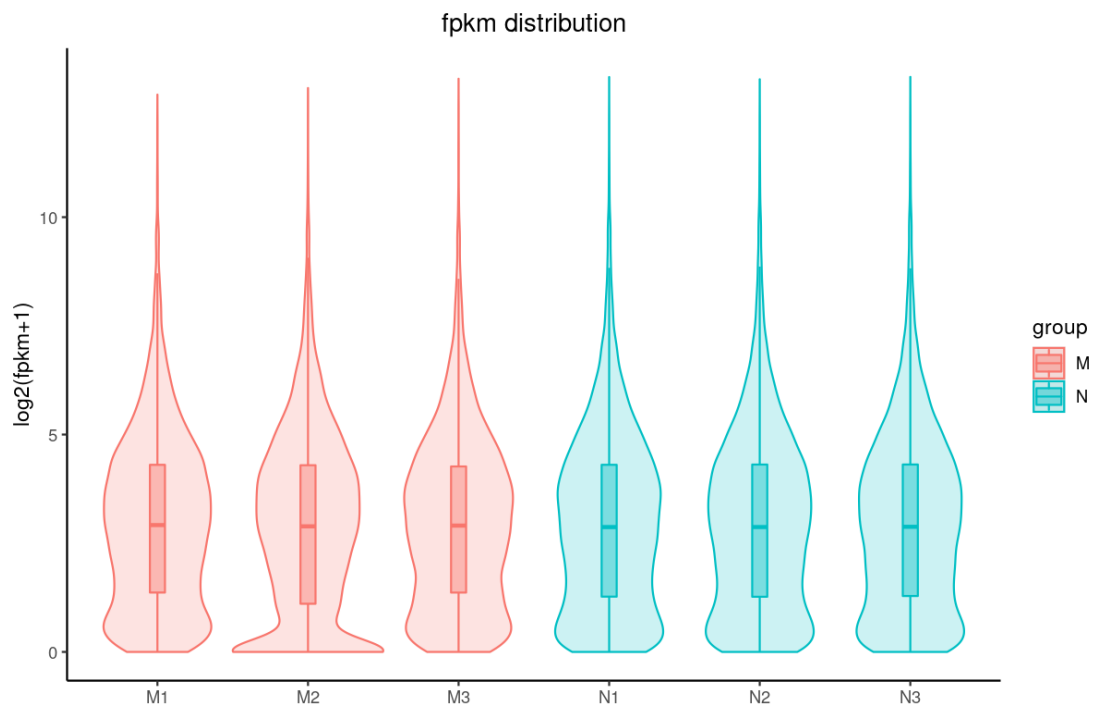

Supplement: f5 [file 6400162.f5.pdf]

Pearson correlation between samples

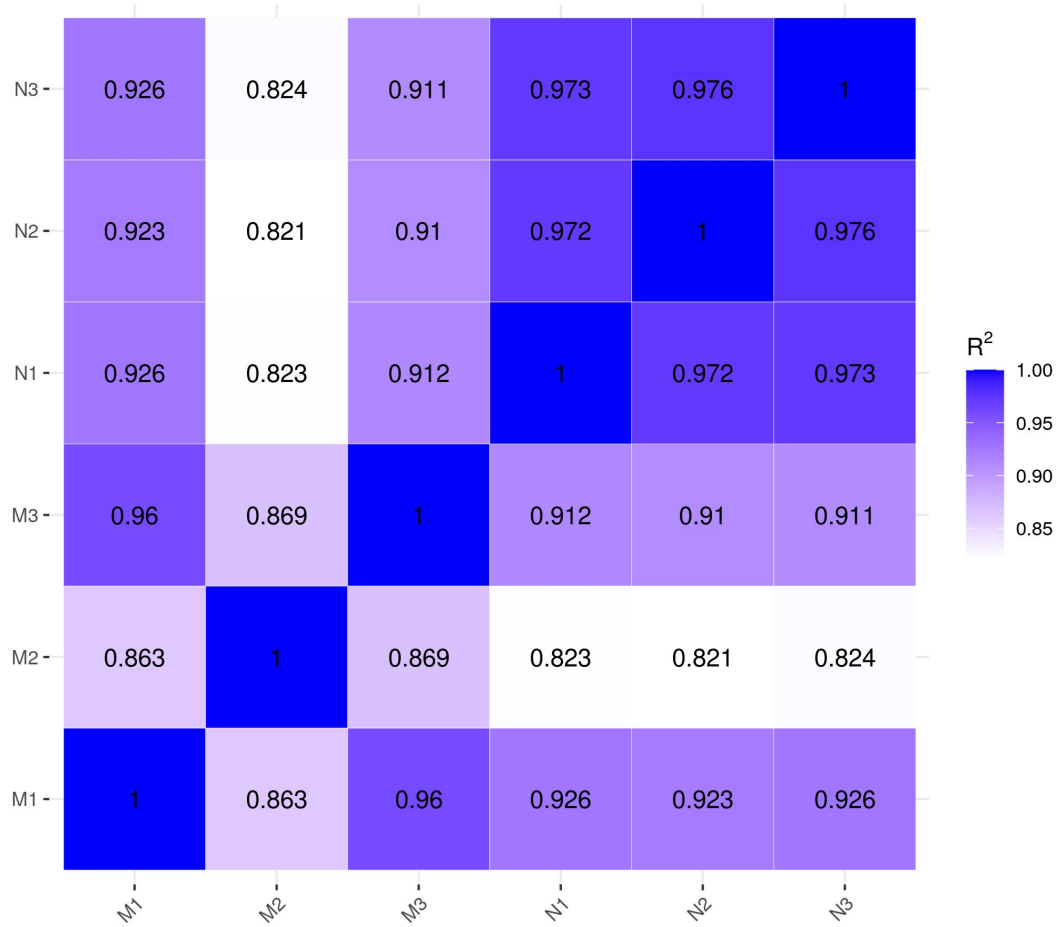

Supplement: f6 [file 6400162.f6.pdf]

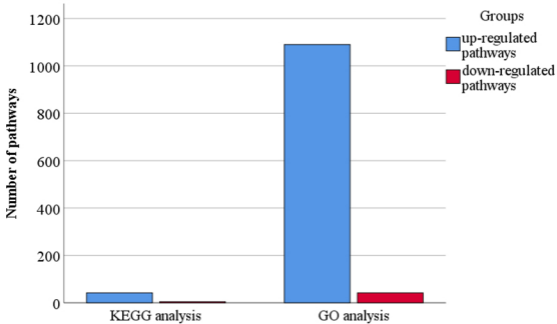

Supplement: f8 [file 6400162.f8.pdf]
